# Supplementary material for: Characterization of a new podovirus infecting Paenibacillus larvae
Source: PubMed Central journal article supplement (PMC6937236; doi:10.1038/s41598-019-56699-y), 2019-12-30
Supplement: 41598_2019_56699_MOESM1_ESM.pdf [file 41598_2019_56699_MOESM1_ESM.pdf]

## Supplementary Information

### **Characterization of a new podovirus infecting *Paenibacillus larvae***

Henrique G. Ribeiro<sup>1</sup>, Luís D. R. Melo<sup>1</sup>, Hugo Oliveira<sup>1</sup>, Maarten Boon<sup>2</sup>, Rob Lavigne<sup>2</sup>, Jean-Paul Noben<sup>3</sup>, Joana Azeredo<sup>1</sup> and Ana Oliveira<sup>\*1</sup>

<sup>1</sup>CEB - Centre of Biological Engineering, LIBRO - Laboratório de Investigação em Biofilmes Rosário Oliveira, University of Minho, 4710-057, Braga, Portugal.

<sup>2</sup>Laboratory of Gene Technology, KU Leuven, Leuven, Belgium.

<sup>3</sup>Biomedical Research Institute and Transnational University Limburg, Hasselt University, Agoralaan D, 3590 Hasselt, Belgium

\*Corresponding Author: [anaoliveira@deb.uminho.pt](mailto:anaoliveira@deb.uminho.pt)

**Table S1:** PCR conditions for 16S-PCR of *P. larvae* identification and rep-PCR genotyping.

| Target gene     | Sequence (5'-3')                                              | PCR conditions                                                                         |
|-----------------|---------------------------------------------------------------|----------------------------------------------------------------------------------------|
| <b>16S rRNA</b> | Fw: CTTGTGTTTCTTTTCGGGAGACGCC<br>Rev: TCTTAGAGTGCCACCTCTGCG   | 10 min 95 °C<br>15 sec 95 °C; 15 sec 60 °C; 15 sec 72 °C<br>(30 cycles)<br>3 min 72 °C |
| <b>rep-PCR</b>  | ERIC2: AAGTAAGTGACTGGGGTGAGC<br>ERIC1R: ATGTAAGCTCCTGGGGATTCA | 3 min 95 °C<br>45 sec 95 °C; 30 sec 45 °C; 3 min 72 °C<br>(30 cycles)<br>10 min 72 °C  |

**Table S2:** API480 genome annotation and BLASTP or HHpred homology. CDSs unique to API480 are in white; CDSs homologue to bacteria are coloured in light grey; CDSs homologue to phages are coloured in dark grey; proteins with an identified function are highlighted in bold. <sup>1</sup> indicates proteins with assigned function validated by ESI-MS/MS.

| gp | Ni    | Nf    | NN   | +/- | AA   | Product                                     | Blastp/HHpred                                                                                  | E-value |
|----|-------|-------|------|-----|------|---------------------------------------------|------------------------------------------------------------------------------------------------|---------|
| 1  | 1     | 426   | 426  | +   | 141  | Hypothetical protein                        | Hypothetical protein [Bacillus thuringiensis]                                                  | 3E-13   |
| 2  | 404   | 658   | 255  | +   | 84   | Hypothetical protein                        |                                                                                                |         |
| 3  | 655   | 963   | 309  | +   | 102  | Hypothetical protein                        | Hypothetical protein [Bacillus phage Mgbh1]                                                    | 6E-18   |
| 4  | 956   | 2407  | 1452 | +   | 483  | <b>Terminase large subunit</b> <sup>1</sup> | Phage terminase, large subunit, PBSX family (TIGR01547) [uncultured Mediterranean phage uvMED] | 2E-43   |
| 5  | 2420  | 2611  | 192  | +   | 63   | Hypothetical protein                        |                                                                                                |         |
| 6  | 2627  | 4405  | 1779 | +   | 592  | <b>Portal protein</b> <sup>1</sup>          | Portal protein [Enterobacteria phage P22]                                                      | 1E-46   |
| 7  | 4562  | 5371  | 810  | +   | 269  | Hypothetical protein                        | Hypothetical protein [Bacillus cereus]                                                         | 1E-21   |
| 8  | 5462  | 6403  | 942  | +   | 313  | <b>Major capsid protein</b> <sup>1</sup>    | Major capsid protein [Bacillus phage BM5]                                                      | 1E-39   |
| 9  | 6470  | 6733  | 264  | +   | 87   | Hypothetical protein                        | Hypothetical protein [Bacillus thuringiensis]                                                  | 1E-15   |
| 10 | 6772  | 7152  | 381  | +   | 126  | Hypothetical protein                        | Hypothetical protein [Bacillus sp. J37]                                                        | 2E-06   |
| 11 | 7161  | 9152  | 1992 | +   | 663  | Hypothetical protein                        |                                                                                                |         |
| 12 | 9164  | 10342 | 1179 | +   | 392  | Hypothetical protein                        |                                                                                                |         |
| 13 | 10354 | 10647 | 294  | +   | 97   | Hypothetical protein                        |                                                                                                |         |
| 14 | 10649 | 11578 | 930  | +   | 309  | Hypothetical protein                        |                                                                                                |         |
| 15 | 11591 | 12559 | 969  | +   | 322  | Hypothetical protein                        |                                                                                                |         |
| 16 | 12564 | 17459 | 4896 | +   | 1631 | Hypothetical protein                        |                                                                                                |         |
| 17 | 17841 | 18083 | 243  | +   | 80   | <b>Holin</b> <sup>1</sup>                   | Holin_BhIA [PF10960.8 hit]                                                                     | 8E-23   |
| 18 | 18101 | 18772 | 672  | +   | 223  | <b>Endolysin</b>                            | N-acetylmuramoyl-L-alanine amidase [Paenibacillus phage Vegas]                                 | 7E-159  |
| 19 | 18778 | 19248 | 471  | +   | 156  | Hypothetical protein                        | Hypothetical protein [Paenibacillus larvae]                                                    | 2E-109  |
| 20 | 19266 | 19541 | 276  | +   | 91   | Hypothetical protein                        | Hypothetical protein WANDERER_22 [Paenibacillus phage Wanderer]                                | 9E-53   |
| 21 | 19554 | 19793 | 240  | +   | 79   | <b>Holin</b> <sup>1</sup>                   | Phage_holin_5_1 [PF06946.11 hit]                                                               | 2E-17   |
| 22 | 19881 | 20150 | 270  | -   | 89   | Hypothetical protein                        |                                                                                                |         |
| 23 | 20190 | 20432 | 243  | -   | 80   | Hypothetical protein                        | Nucleotide binding domain [Escherichia coli K12]                                               | 1E-12   |
| 24 | 20425 | 21408 | 984  | -   | 327  | <b>DNA-binding protein</b> <sup>1</sup>     | ParM/StbA family protein [Bacillus mycoides]                                                   | 3E-59   |
| 25 | 21603 | 21893 | 291  | -   | 96   | Hypothetical membrane protein               | Hypothetical protein [Paenibacillus larvae]                                                    | 7E-47   |

|    |       |       |      |   |     |                                              |                                                                 |          |
|----|-------|-------|------|---|-----|----------------------------------------------|-----------------------------------------------------------------|----------|
| 26 | 21920 | 22249 | 330  | - | 109 | <b>mRNA-degrading endonucleas 1</b>          | mRNA-degrading endonuclease [Paenibacillus larvae]              | 2E-73    |
| 27 | 22246 | 22515 | 270  | - | 89  | <b>Antitoxin MazE</b>                        | Antitoxin MazE [Paenibacillus larvae subsp. larvae]             | 3E-54    |
| 28 | 22580 | 22777 | 198  | + | 65  | Hypothetical membrane protein                |                                                                 |          |
| 29 | 22906 | 23064 | 159  | - | 52  | Hypothetical protein                         |                                                                 |          |
| 30 | 23057 | 23431 | 375  | - | 124 | Hypothetical protein                         | Hypothetical protein [Paenibacillus larvae]                     | 6E-75    |
| 31 | 23415 | 23603 | 189  | - | 62  | Hypothetical protein                         | Hypothetical protein [Paenibacillus larvae]                     | 4E-31    |
| 32 | 23600 | 23800 | 201  | - | 66  | Hypothetical membrane protein                |                                                                 |          |
| 33 | 23805 | 23996 | 192  | - | 63  | Hypothetical membrane protein                |                                                                 |          |
| 34 | 23981 | 24241 | 261  | - | 86  | Hypothetical protein                         | Hypothetical protein TRIPP_91 [Paenibacillus phage Tripp]       | 2E-37    |
| 35 | 24243 | 24428 | 186  | - | 61  | Hypothetical membrane protein                |                                                                 |          |
| 36 | 24484 | 24864 | 381  | - | 126 | Hypothetical protein                         | Hypothetical protein [Paenibacillus larvae]                     | 3E-71    |
| 37 | 24871 | 25161 | 291  | - | 96  | Hypothetical protein                         | Hypothetical protein WANDERER_61 [Paenibacillus phage Wanderer] | 8E-60    |
| 38 | 25154 | 25477 | 324  | - | 107 | Hypothetical protein                         | Hypothetical protein C7CDELTA_68 [Paenibacillus phage C7Cdelta] | 6E-58    |
| 39 | 25507 | 26010 | 504  | - | 167 | <b>dUTP pyrophosphatase 1</b>                | dUTP pyrophosphatase [Paenibacillus phage C7Cdelta]             | 9E-72    |
| 40 | 26022 | 26282 | 261  | - | 86  | Hypothetical protein                         | Hypothetical protein VEGAS_60 [Paenibacillus phage Vegas]       | 7E-12    |
| 41 | 26298 | 26417 | 120  | - | 39  | Hypothetical protein                         | Hypothetical protein VEGAS_59 [Paenibacillus phage Vegas]       | 3E-20    |
| 42 | 26414 | 26602 | 189  | - | 62  | Hypothetical protein                         | Hypothetical protein [Paenibacillus larvae]                     | 1E-22    |
| 43 | 26605 | 26805 | 201  | - | 66  | Hypothetical protein                         | Hypothetical protein [Paenibacillus larvae]                     | 4E-34    |
| 44 | 26798 | 27301 | 504  | - | 167 | <b>Resolvase 1</b>                           | Holliday junction resolvase [Escherichia coli]                  | 2,80E-24 |
| 45 | 27303 | 27497 | 195  | - | 64  | Hypothetical protein                         |                                                                 |          |
| 46 | 27613 | 29838 | 2226 | - | 741 | <b>DNA polymerase I 1</b>                    | DNA polymerase I [Geobacillus stearothermophilus]               | 3E-76    |
| 47 | 29870 | 32662 | 2793 | - | 930 | <b>DNA primase 1</b>                         | DNA primase small subunit [Bacillus phage vB_BboS-125]          | 2E-12    |
| 48 | 32686 | 33147 | 462  | - | 153 | <b>Single-stranded DNA-binding protein 1</b> | Single-stranded DNA-binding protein [Paenibacillus larvae]      | 9E-86    |
| 49 | 33214 | 33756 | 543  | - | 180 | Hypothetical protein                         |                                                                 |          |
| 50 | 33807 | 34355 | 549  | - | 182 | <b>Host-nuclease inhibitor 1</b>             | Host-nuclease inhibitor [Desulfovibrio vulgaris]                | 3E-28    |
| 51 | 34336 | 34542 | 207  | - | 68  | Hypothetical protein                         | Hypothetical protein WANDERER_58 [Paenibacillus phage Wanderer] | 3E-17    |
| 52 | 34532 | 34774 | 243  | - | 80  | Hypothetical protein                         | Hypothetical protein [Paenibacillus larvae]                     | 1E-49    |
| 53 | 34767 | 34997 | 231  | - | 76  | Hypothetical protein                         | Hypothetical protein [Paenibacillus larvae]                     | 3E-38    |
| 54 | 35004 | 35312 | 309  | - | 107 | Hypothetical protein                         | Hypothetical protein [Paenibacillus larvae]                     | 6E-69    |
| 55 | 35359 | 35541 | 183  | - | 60  | Hypothetical protein                         | Hypothetical protein WANDERER_53 [Paenibacillus phage Wanderer] | 7E-26    |

|    |       |       |      |   |     |                                                  |                                                           |        |
|----|-------|-------|------|---|-----|--------------------------------------------------|-----------------------------------------------------------|--------|
| 56 | 35538 | 35798 | 261  | - | 86  | Hypothetical protein                             |                                                           |        |
| 57 | 35802 | 37370 | 1569 | - | 522 | <b>DEAD/DEAH box helicase</b> <sup>1</sup>       | DEAD/DEAH box helicase [Bacillus thuringiensis]           | 3E-129 |
| 58 | 37363 | 37515 | 153  | - | 50  | Hypothetical protein                             |                                                           |        |
| 59 | 37796 | 38482 | 687  | - | 228 | Hypothetical protein                             | Hypothetical protein [Bacillus cereus]                    | 8E-44  |
| 60 | 38495 | 39013 | 519  | - | 172 | Hypothetical protein                             | Hypothetical protein [Bacillus cereus]                    | 2E-20  |
| 61 | 39031 | 39198 | 168  | - | 55  | Hypothetical membrane protein                    |                                                           |        |
| 62 | 39188 | 39346 | 159  | - | 52  | Hypothetical protein                             |                                                           |        |
| 63 | 39387 | 39638 | 252  | - | 83  | Hypothetical protein                             | Hypothetical protein [Paenibacillus larvae]               | 2E-43  |
| 64 | 39673 | 39876 | 204  | - | 67  | Hypothetical protein                             |                                                           |        |
| 65 | 39889 | 40290 | 402  | - | 133 | Hypothetical protein                             |                                                           |        |
| 66 | 40355 | 40981 | 627  | - | 208 | Hypothetical protein                             |                                                           |        |
| 67 | 40968 | 41144 | 177  | - | 58  | Hypothetical membrane protein                    |                                                           |        |
| 68 | 41189 | 41380 | 192  | - | 63  | Hypothetical protein                             |                                                           |        |
| 69 | 41402 | 41584 | 183  | - | 60  | Hypothetical protein                             |                                                           |        |
| 70 | 41614 | 42114 | 501  | - | 166 | <b>Antirestriction protein ArdA</b> <sup>1</sup> | Antirestriction protein ArdA [Paenibacillus larvae]       | 6E-26  |
| 71 | 42165 | 42347 | 183  | - | 60  | Hypothetical protein                             | Hypothetical protein [Paenibacillus larvae]               | 5E-24  |
| 72 | 42358 | 42618 | 261  | - | 86  | Hypothetical protein                             |                                                           |        |
| 73 | 42742 | 42987 | 246  | - | 81  | Hypothetical protein                             | Hypothetical protein [Brevibacillus laterosporus]         | 1E-22  |
| 74 | 42992 | 43219 | 228  | - | 75  | Hypothetical protein                             | Hypothetical protein [Paenibacillus larvae]               | 1E-36  |
| 75 | 43546 | 43677 | 132  | - | 43  | Hypothetical protein                             |                                                           |        |
| 76 | 43704 | 44159 | 456  | - | 151 | Hypothetical protein                             | Hypothetical protein [Paenibacillus larvae]               | 1E-32  |
| 77 | 44461 | 44676 | 216  | - | 71  | Hypothetical protein                             | Hypothetical protein JENST_60 [Brevibacillus phage Jenst] | 5E-07  |



**Table S4:** Function and distribution of all API480 genes (n=19) shared with *P. larvae* phages, according to Phamerator. For each API480 gene product (pham) that is shared, the number of phages per cluster that have protein homologs are listed. The total number of phages that belong to each cluster are in brackets. Below, the percentage of phages for each cluster that shared proteins with API480 is provided.

| API480 GENOME |                                 |                |                   |                |               |                   |
|---------------|---------------------------------|----------------|-------------------|----------------|---------------|-------------------|
| Protein       | Function                        | Fern<br>(n=30) | Harrison<br>(n=2) | Vegas<br>(n=7) | Lily<br>(n=1) | Halcyone<br>(n=8) |
| gp17          | Holin                           | 30             | 2                 | 7              | 1             | 0                 |
| gp18          | Endolysin                       | 30             | 2                 | 7              | 1             | 0                 |
| gp19          | Hypothetical protein            | 0              | 0                 | 4              | 0             | 0                 |
| gp20          | Hypothetical protein            | 1              | 2                 | 2              | 0             | 0                 |
| gp21          | Holin                           | 30             | 2                 | 7              | 1             | 0                 |
| gp30          | Hypothetical protein            | 0              | 0                 | 4              | 0             | 0                 |
| gp34          | Hypothetical protein            | 0              | 0                 | 0              | 0             | 8                 |
| gp38          | Hypothetical protein            | 6              | 0                 | 0              | 3             | 3                 |
| gp37          | Hypothetical protein            | 0              | 0                 | 2              | 0             | 7                 |
| gp39          | dUTP diphosphatase              | 0              | 0                 | 0              | 0             | 7                 |
| gp40          | Hypothetical protein            | 0              | 0                 | 4              | 0             | 0                 |
| gp41          | Hypothetical protein            | 0              | 0                 | 4              | 0             | 0                 |
| gp42          | Hypothetical protein            | 0              | 0                 | 0              | 0             | 1                 |
| gp48          | Dingle stranded binding protein | 0              | 2                 | 0              | 0             | 0                 |
| gp50          | Host-nuclease inhibitor         | 0              | 2                 | 0              | 0             | 0                 |
| gp52          | Hypothetical protein            | 1              | 0                 | 2              | 0             | 0                 |
| gp53          | Hypothetical protein            | 0              | 2                 | 2              | 0             | 1                 |
| gp55          | Hypothetical protein            | 11             | 2                 | 2              | 1             | 0                 |
| gp73          | Hypothetical protein            | 1              | 2                 | 6              | 0             | 0                 |
|               |                                 | <b>19 %</b>    | <b>47 %</b>       | <b>39 %</b>    | <b>37 %</b>   | <b>18 %</b>       |

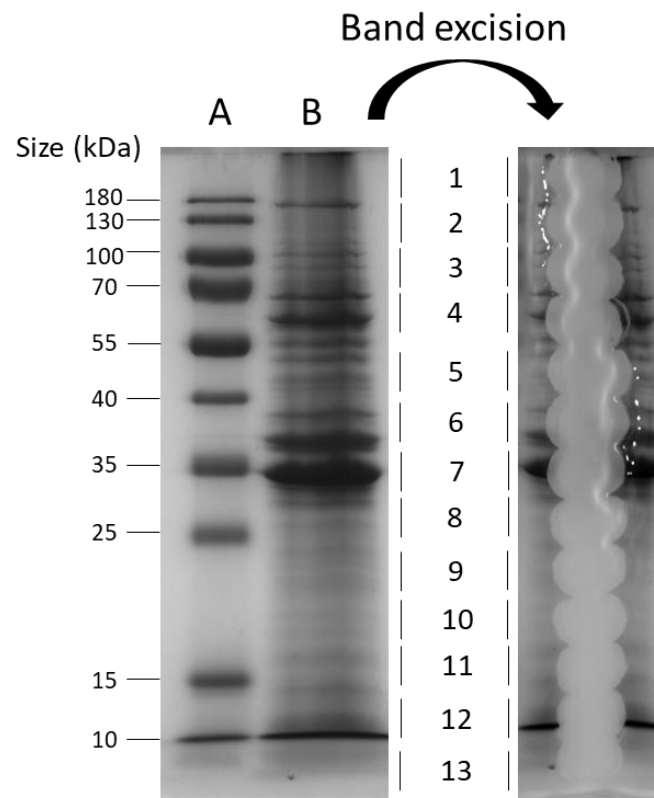

**Figure S1:** SDS-PAGE analysis of the API480 phage proteins (lane B) on a 12% SDS-PAGE separation gel. Lane A shows the protein ladder bands from 10 to 180 kDa. The entire lane B was cut into 13 slices, numbered on the right. Band excision is illustrated in the cropped image from the same gel, as indicated.



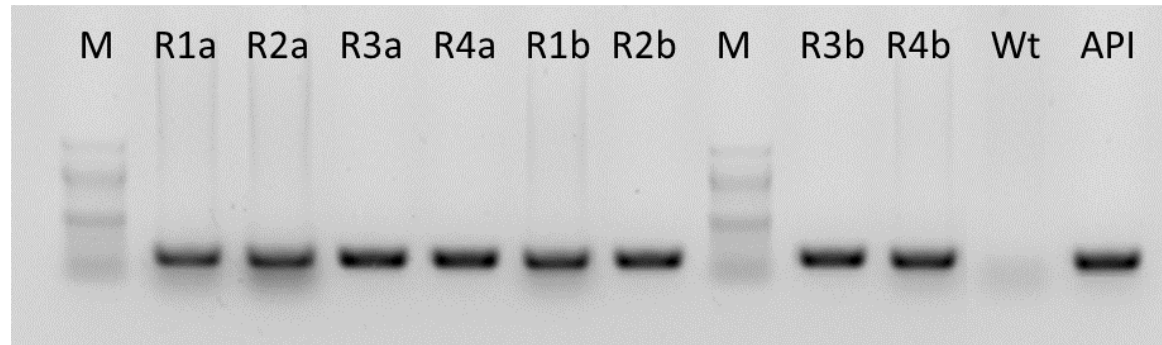

**Figure S2:** Amplification of CDS<sub>12</sub> fragment. Agarose gel revealing 227 bp bands in R-PI27 strains tested (R1, R2, R3 and R4 in duplicate (a and b), in API480 (API) and its absence in the original PI02-27 strain (Wt). DNA ladder 100 bp NEB (M).

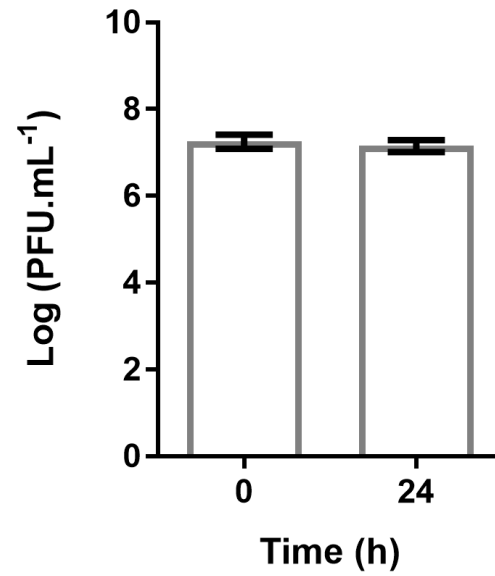

**Figure S3:** Effect of 50% (w/v) sucrose on API480 phage concentration (PFU.mL<sup>-1</sup>). Data shows represents the average of three independent assays and error bars indicate the standard deviation. LOD (Limit of Detection) = 3 Log. Statistical significance,  $p < 0.05$ .
